# Supplementary material
Source: PubMed Central journal article supplement (PMC9203876)
Supplement: NIHMS1775988-supplement-Supplemental_Digital_Content_1.pdf [file NIHMS1775988-supplement-Supplemental_Digital_Content_1.pdf]

**Supplementary Figure 1. Discrete choice experiment attributes and levels to improve care engagement among people living with HIV experiencing homeless/unstable housing.** There were six clinical feature attributes with two to three possible levels for each choice task.

| Attribute                                   | Levels                                                                                                                                                  |                                                                                                                                                                                  |                                                                                                                                              |
|---------------------------------------------|---------------------------------------------------------------------------------------------------------------------------------------------------------|----------------------------------------------------------------------------------------------------------------------------------------------------------------------------------|----------------------------------------------------------------------------------------------------------------------------------------------|
| <b>Type of visit</b>                        | In-person visits only<br>                                              | In-person visits and access to phone visits if I want<br>                                      | In-person visits and access to video visits if I want<br> |
| <b>Visit scheduling</b>                     | Scheduled visits<br>                                                   | Drop-in visits<br>                                                                            |                                                                                                                                              |
| <b>Navigator assistance</b>                 | A navigator meets me to help me connect to the clinic for a visit<br> | I connect to the clinic for a visit on my own, without the assistance from a navigator<br>   |                                                                                                                                              |
| <b>Visit and lab draw location</b>          | I can have a clinic visit with my team at Ward 86<br>                | I can have a clinic visit with my team at either Ward 86 or a location in the Tenderloin<br> |                                                                                                                                              |
| <b>Incentive for coming to clinic visit</b> | \$0                                                                                                                                                     | \$10 Safeway gift card for attending visit (max once/week)<br>                               | \$20 Safeway gift card per visit (max once/week)<br>    |
| <b>Single vs. group of doctors</b>          | I see the same doctor each time<br>                                  | I see a small group of doctors who work together for my care<br>                            |                                                                                                                                              |
