# Supplementary material
Source: PubMed Central journal article supplement (PMC9203876)

Supplementary Figure 2. Recruitment Diagram of individuals receiving care at the San Francisco public HIV clinic during the COVID-19 pandemic. HUH = homeless/unstably housed.

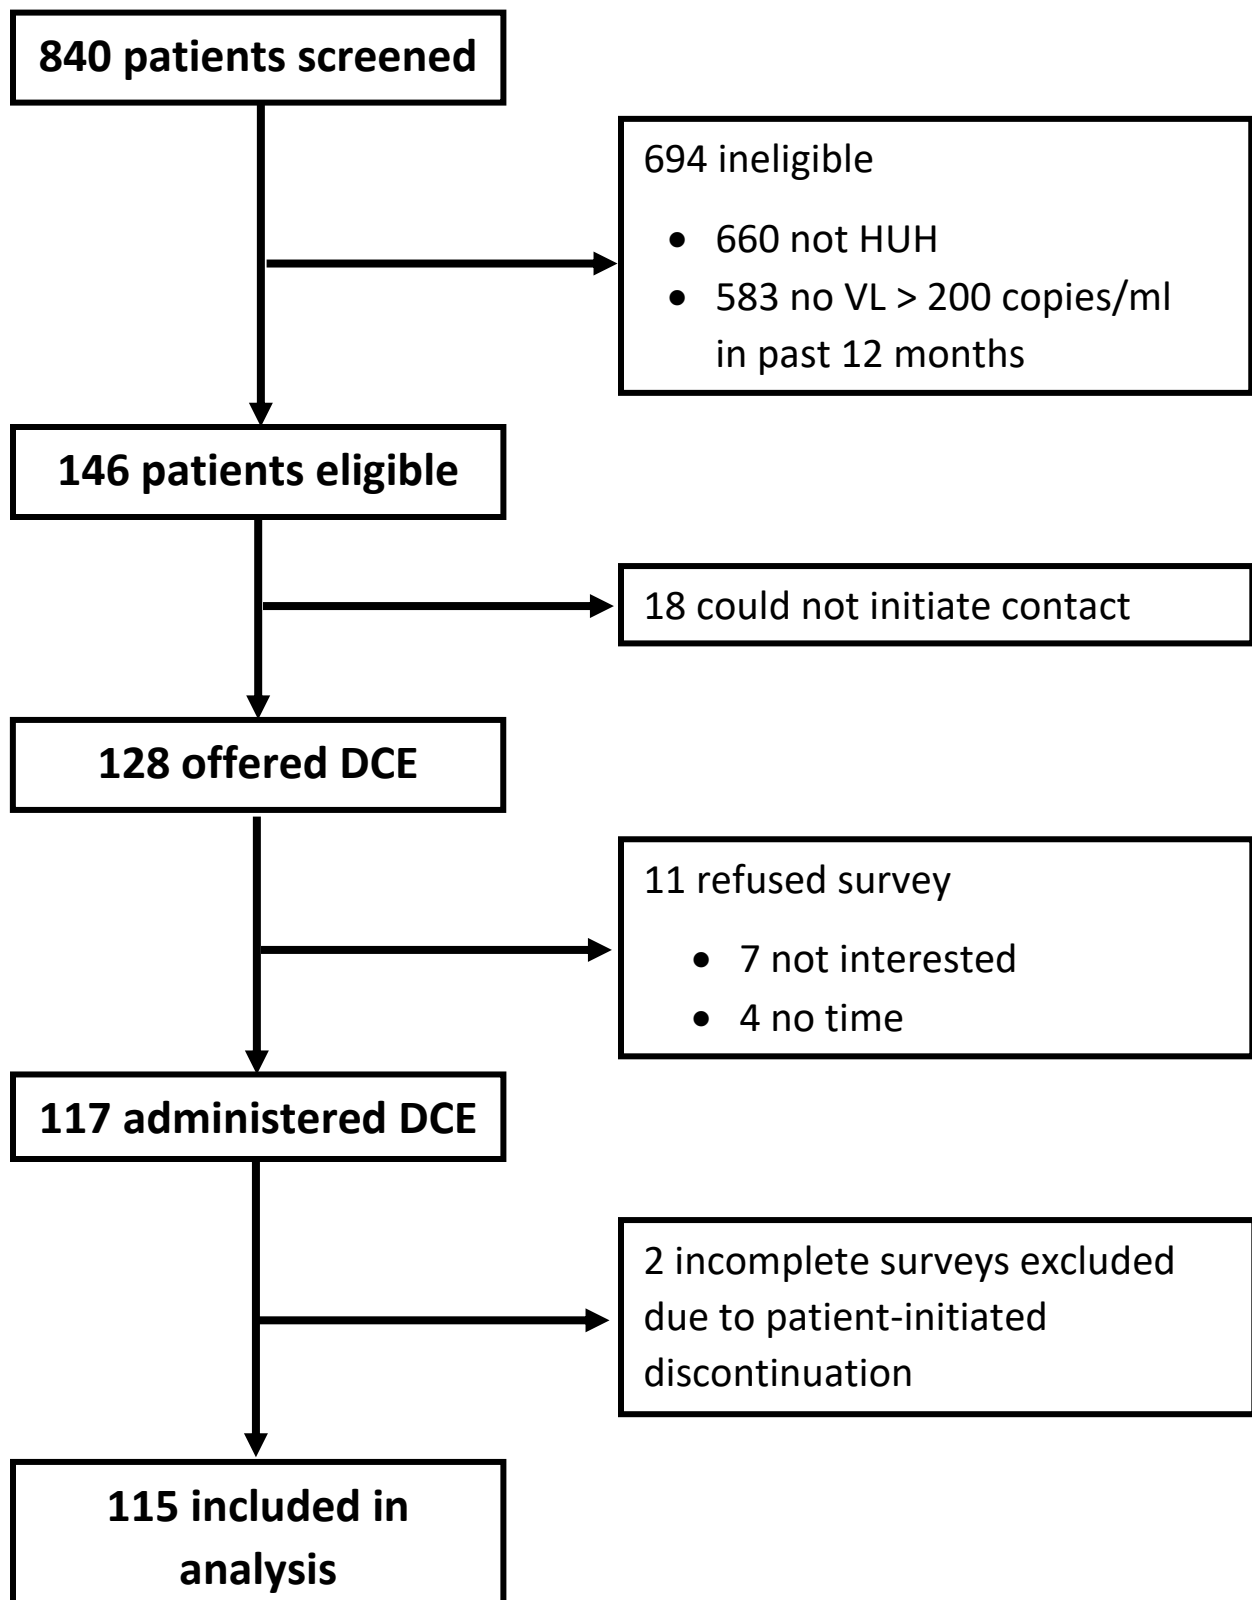

Supplement: NIHMS1775988-supplement-Supplemental_Digital_Content_2.pdf [file NIHMS1775988-supplement-Supplemental_Digital_Content_2.pdf]
