# Supplementary material
Source: PubMed Central journal article supplement (PMC9203876)
Supplement: NIHMS1775988-supplement-Supplemental_Digital_Content_3.pdf [file NIHMS1775988-supplement-Supplemental_Digital_Content_3.pdf]

**Supplementary Table 1. Additional participant characteristics among individuals living with HIV and receiving care at the San Francisco public HIV clinic during the COVID-19 pandemic, by preference phenotype according to latent class group (N=115).**

| <b>Characteristic</b>             | <b>Total Sample<br/>N = 115<br/>n (%)</b> | <b>Flexible Care<br/>n = 78<br/>n (%)</b> | <b>One Provider<br/>n = 37<br/>n (%)</b> | <b>P-value</b> |
|-----------------------------------|-------------------------------------------|-------------------------------------------|------------------------------------------|----------------|
| Survey Language                   |                                           |                                           |                                          | N/A            |
| English                           | 115/115 (100%)                            | 78/78 (100%)                              | 37/37 (100%)                             |                |
| Age Category                      |                                           |                                           |                                          | 0.01           |
| 25-39                             | 44 (38%)                                  | 36 (46%)                                  | 8 (22%)                                  |                |
| 40-55                             | 52 (45%)                                  | 28 (36%)                                  | 24 (64%)                                 |                |
| 55+                               | 19 (17%)                                  | 14 (18%)                                  | 5 (13%)                                  |                |
| Education                         |                                           |                                           |                                          | 0.54           |
| K-8                               | 18 (16%)                                  | 10 (13%)                                  | 8 (22%)                                  |                |
| High school/GED                   | 45 (40%)                                  | 32 (41%)                                  | 13 (35%)                                 |                |
| Some college                      | 38 (33%)                                  | 27 (35%)                                  | 11 (30%)                                 |                |
| Completed college                 | 14 (12%)                                  | 9 (12%)                                   | 5 (13%)                                  |                |
| Length of Time with Current Phone |                                           |                                           |                                          | 0.02           |
| < 1 month                         | 17 (19%)                                  | 13 (25%)                                  | 4 (11%)                                  |                |
| 1 - 6 months                      | 40 (45%)                                  | 27 (51%)                                  | 13 (37%)                                 |                |
| 6 - 12 months                     | 18 (20%)                                  | 10 (19%)                                  | 8 (23%)                                  |                |
| > 1 year                          | 13 (15%)                                  | 3 (6%)                                    | 10 (29%)                                 |                |
| Clinic Utilization ††             |                                           |                                           |                                          |                |
| Scheduled in-person visit         | 110 (96%)                                 | 74 (95%)                                  | 36 (97%)                                 | 0.55           |
| Attended in-person visit          | 107 (93%)                                 | 73 (93%)                                  | 34 (92%)                                 | 0.74           |
| # of in-person visits:            | 7 [3-16]                                  | 8 [3-21]                                  | 6 [3-10]                                 | 0.03           |
| Median [IQR]                      |                                           |                                           |                                          |                |
| Scheduled telehealth visit        | 55 (48%)                                  | 27 (35%)                                  | 28 (76%)                                 | <0.01          |
| Attended telehealth visit         | 20 (17%)                                  | 5 (6%)                                    | 15 (40%)                                 | <0.01          |
| # of telehealth visits:           | 0 [0-0]                                   | 0 [0-0]                                   | 0 [0-1]                                  | <0.01          |
| Median [IQR]                      |                                           |                                           |                                          |                |
| Viral Load Category ‡‡            |                                           |                                           |                                          | 0.34           |
| Undetectable (< 200 copies/mL)    | 58 (50%)                                  | 43 (55%)                                  | 15 (41%)                                 |                |
| Detectable (> 200 copies/mL)      | 44 (38%)                                  | 27 (35%)                                  | 17 (46%)                                 |                |
| Missing                           | 13 (11%)                                  | 8 (10%)                                   | 5 (14%)                                  |                |
| CD4 Category §§                   |                                           |                                           |                                          | 0.51           |
| < 200 cells/mm <sup>3</sup>       | 35 (30%)                                  | 23 (30%)                                  | 12 (32%)                                 |                |
| 200 – 349 cells/mm <sup>3</sup>   | 17 (15%)                                  | 12 (15%)                                  | 5 (14%)                                  |                |
| 350 – 499 cells/mm <sup>3</sup>   | 22 (19%)                                  | 18 (23%)                                  | 4 (11%)                                  |                |
| > 500 cells/mm <sup>3</sup>       | 33 (29%)                                  | 21 (27%)                                  | 12 (32%)                                 |                |
| Missing                           | 8 (7%)                                    | 4 (5%)                                    | 4 (11%)                                  |                |

†† Includes medical and social work visits 4 months prior to survey, all visits scheduled or occurred during local SIP ordinances. ‡ ‡ Most recent viral load measurement 6 months prior to survey date. §§ Most recent CD4 cell count 12 months prior to survey date.
